# Supplementary material for: The Effect of Balloon Inflating Distraction on Pain Intensity During Venous Blood Sampling in Children: A Randomized Controlled Trial
Source: Research Square preprint supplement (doi:10.21203/rs.3.rs-711305/v1), 2021-08-11
Supplement: Supplementary file 1 [file Cover Letter.docx]

**Cover Letter:**

**The effect of balloon inflating distraction on pain intensity during venous blood sampling in children: A randomized controlled trial**

Somaeh. Salehi Sarbijan1, Roghiah Mehdipoor Rabori2,3, Esmat Nouhi4,5*

**Running head: The Effect of Balloon Inflating on Pain Level Children**

This is an Original Article

We certify that we have participated sufficiently in the intellectual content, conception and design of this work or the analysis and interpretation of the data (when applicable), as well as the writing of the manuscript, to take public responsibility for it and have agreed to have our name listed as a contributor. We believe the manuscript represents valid work. Neither this manuscript nor one with substantially similar content under our authorship has been published or is being considered for publication.

Somaeh. Salehi Sarbijan1, Roghiah Mehdipoor Rabori 2,3, Esmat Nouhi*4,5

M.s. *Neonatal Nursing*, Nursing Research Center, Kerman University of Medical Sciences, Kerman, Iran

Email: ssina8650@gmail.com

Nursing Research Center, Kerman University of Medical Sciences, Kerman, Iran.

Razi Faculty of Nursing and Midwifery, Department of *Medical Surgical Nursing*, Kerman University of Medical Sciences, Kerman, Iran.

Email:rm41321@yahoo.com

ORCID ID: ORCID ID: *0000-0002-7608-9545*

Razi Faculty of Nursing and Midwifery, Department of Medical Surgical Nursing, Kerman University Of Medical Sciences, Kerman, Iran

Nursing Research Center, Kerman University of Medical Sciences, Kerman, Iran.

ORCID ID: 0000-0003-1906-4146

Email: [e_nuhi@kmu.ac.ir](mailto:e_nuhi@kmu.ac.ir) (Corresponding Author)

**Corresponding Author:** Esmat Nouhi

**Address:** Iran - Kerman , School of Nursing & Midwifery Kerman University Of Medical Sciences

**Tell:** +98 3431 32 5220 **FAX:** +98 3431 32 5218

**Mobile:** 09133407727

**Conflicts of interest:** The authors report no conflicts of interest. The authors alone are responsible for the content and writing of this article.
