# Supplementary material for: The Effect of Balloon Inflating Distraction on Pain Intensity During Venous Blood Sampling in Children: A Randomized Controlled Trial
Source: Research Square preprint supplement (doi:10.21203/rs.3.rs-711305/v1), 2021-08-11
Supplement: Supplementary file 1 [file f81219aef9d75476ab0ccc5d.pdf]

Table 1: The participants' Quantitative demographic data in the intervention and control groups

| Variable                 | Group | Intervention     | Control          | P-value |
|--------------------------|-------|------------------|------------------|---------|
|                          |       | Mean $\pm$ SD    | Mean $\pm$ SD    |         |
| Age                      |       | 5.35 $\pm$ 1.12  | 5.37 $\pm$ 1.08  | 1*      |
| Weight                   |       | 19.1 $\pm$ 3.67  | 19.55 $\pm$ 3.97 | 0.68*   |
| Age of Father            |       | 6/02 $\pm$ 33/22 | 98/7 $\pm$ 80/34 | 40/0*   |
| Age of Mother            |       | 5/38 $\pm$ 29/97 | 45/5 $\pm$ 05/29 | 46/0*   |
| number of family members |       | 4.02 $\pm$ 0.86  | 4.15 $\pm$ 1.14  | 1*      |
| Several being children   |       | 1.55 $\pm$ 0.71  | 1.85 $\pm$ 1.14  | 0.38*   |

SD, standard deviation.

\*t Test

**Table 2:** The participants' Qualitative demographic data in the intervention and control groups

| <b>group variable</b>      | <b>intervention<br/>n (%)</b> | <b>control<br/>n (%)</b> | <b>p – value</b> |
|----------------------------|-------------------------------|--------------------------|------------------|
| <b>sex</b>                 |                               |                          | *0.34            |
| girl                       | 18(45)                        | 15(37.5)                 |                  |
| son                        | 22(55)                        | 25(62.5)                 |                  |
| <b>education of father</b> |                               |                          | *0.23            |
| diploma and above          | 11(27.5)                      | 15(37.5)                 |                  |
| under diploma              | 29 (72.5)                     | 25 (62.5)                |                  |
| <b>education of mother</b> |                               |                          | *0.12            |
| diploma and above          | 7 (17.5)                      | 13 (32.5)                |                  |
| under diploma              | 33 (82. 5)                    | 27 (67.5)                |                  |
| <b>father's job</b>        |                               |                          | *0.47            |
| employee                   | 9 (22.5)                      | 12 (30)                  |                  |
| worker                     | 5 (12.5)                      | 7 (17.5)                 |                  |
| free                       | 22 (55)                       | 15 (37.5)                |                  |
| unemployed                 | 4 (10)                        | 6 (15)                   |                  |
| <b>mother's job</b>        |                               |                          | *0.35            |
| housewife                  | 20 (50)                       | 24 (60)                  |                  |
| employee                   | 10 (25)                       | 5 (12.5)                 |                  |
| free                       | 10 (25)                       | 11 (27.5)                |                  |

\*chi square test

Table 3: The mean pain scores two group, before and after intervention

| group                      | variable | pain scores      |                    | p-value |
|----------------------------|----------|------------------|--------------------|---------|
|                            |          | pre intervention | After intervention |         |
|                            |          | mean $\pm$ sd    | mean $\pm$ sd      |         |
| inflating a balloon        |          | 3.32 $\pm$ 1.28  | 2.65 $\pm$ 1.38    | *0.04   |
| control                    |          | 2. 87 $\pm$ 1.18 | 4.2 $\pm$ 1.58     | *0.11   |
| independent samples t-test |          | * * 0.7          | **0.0001           |         |
| p-value                    |          |                  |                    |         |

\*paired t-test

\*\*independent t-test
