# Supplementary material for: The Effect of Balloon Inflating Distraction on Pain Intensity During Venous Blood Sampling in Children: A Randomized Controlled Trial
Source: Research Square preprint supplement (doi:10.21203/rs.3.rs-711305/v1), 2021-08-11
Supplement: Supplementary file 3 [file figure.docx]

Assessed eligibility (n=85)

Allocated to the intervention group(n=40)

Allocated to the control group (n=40)

Excluded (n=5)

Randomized (n=80)

Blood sampling without any intervention

Blood sampling while watching inflating a balloon

Post -test

Post test

Analyzed (n=40)

Analyzed (n=40)

Figure : The steps taken to conduct the study
